# Supplementary material for: Efficient and stable planar perovskite solar cells with carbon quantum dots-doped PCBM electron transport layer
Source: Royal Society of Chemistry journal article supplement (doi:10.1039/c8nj06146g), 2019-01-01
Supplement: c8nj06146g1.pdf [file c8nj06146g1.pdf]

Electronic Supplementary Information for a paper in New Journal of Chemistry

## **Efficient and stable planar perovskite solar cells with carbon quantum dots doped PCBM electron transport layer**

Xiaomeng Zhu<sup>a</sup>, Jing Sun<sup>a</sup>, Shuai Yuan<sup>a</sup>, Ning Li<sup>a</sup>, Zhiwen Qiu<sup>a</sup>, Jinbiao Jia<sup>b</sup>, Yining Liu<sup>c</sup>, Jia Dong<sup>b</sup>, Pin Lv<sup>b</sup>, Bingqiang Cao<sup>a\*</sup>

<sup>a</sup> *School of Materials Science and Engineering, University of Jinan, Jinan 250022, Shandong, China.*

<sup>b</sup> *Department of Physics and Institute of Laser, Qufu Normal University, Qufu 273165, Shandong, China*

<sup>a</sup> *School of Materials Science and Engineering, Shandong University, Jinan 250100, Shandong, China.*

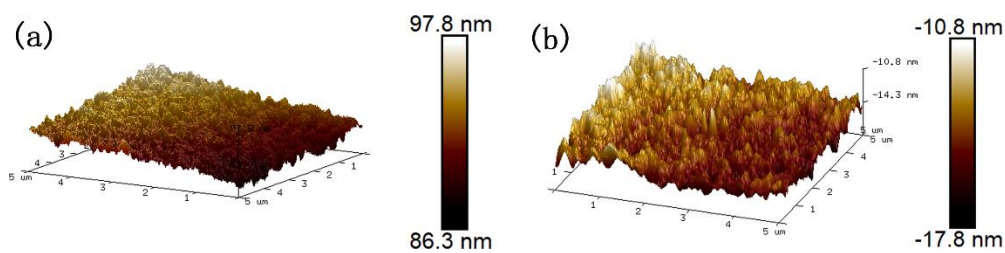

**Figure S1.** AFM images of (a) ITO/PCBM and (b) ITO/PCBM:CQDs film respectively.

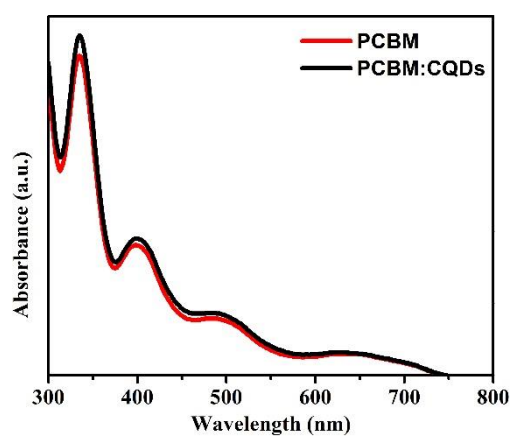

**Figure S2.** The UV-vis absorption spectra of PCBM and PCBM:CQDs films respectively.

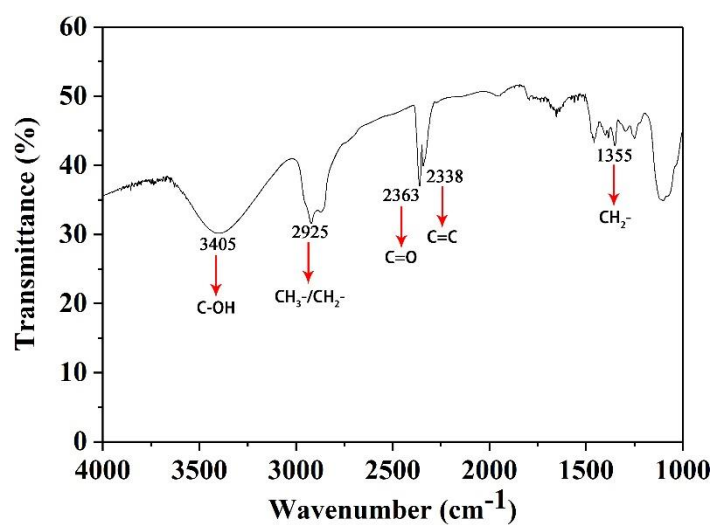

**Figure S3.** FT-IR spectrum of CQDs.

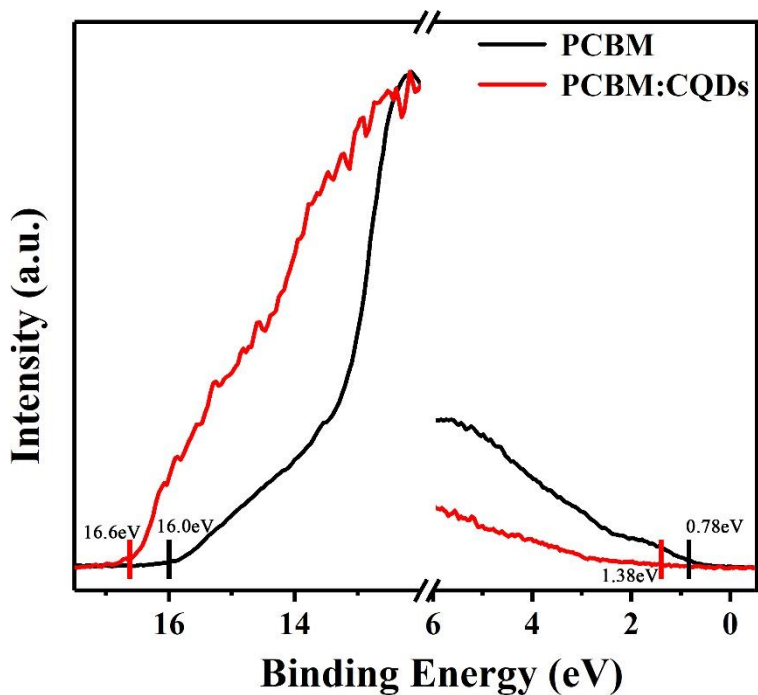

**Figure S4.** UPS spectra of PCBM and PCBM:CQDs films respectively.

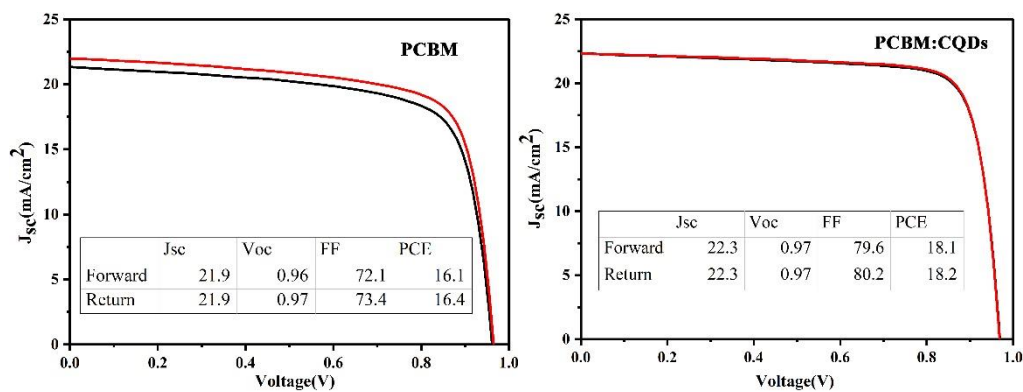

**Figure S5.** J-V curves of pure PCBM and PCBM: CQDs based solar cells respectively.

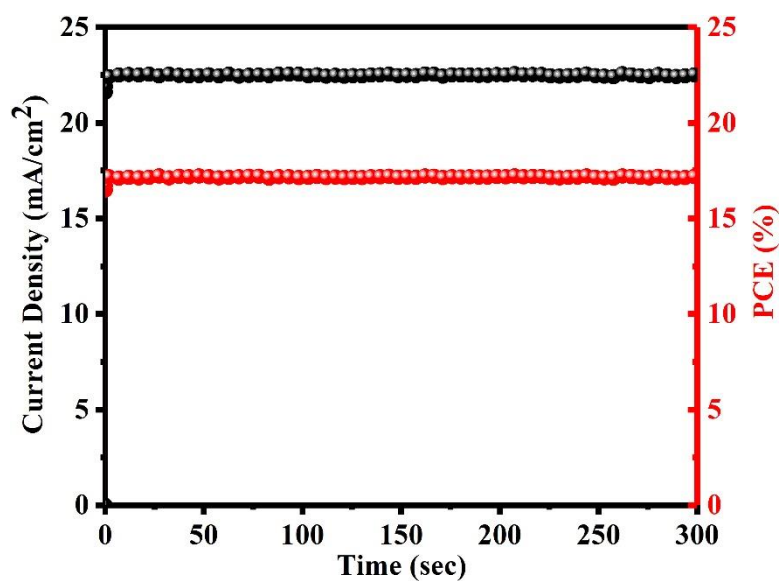

**Figure S6.** The steady-state photocurrent and output PCE of solar cells under one-sun illumination.

**Table S1.** The key parameters of TRPL spectra fitting.

|            | $\tau_1/\text{ns}$ | $A_1/\%$ | $\tau_2/\text{ns}$ | $A_2/\%$ | $\tau_{\text{avg}}/\text{ns}$ |
|------------|--------------------|----------|--------------------|----------|-------------------------------|
| PCBM       | 14.61              | 24.51    | 128.63             | 75.49    | 100.70                        |
| PCBM:CQDs  | 10.04              | 20.35    | 20.89              | 79.65    | 18.72                         |
| Perovskite | 245.46             | 21.60    | 1308.38            | 78.4     | 1078.78                       |

**Table S2.** The fitted parameters of EIS measurements.

|                         | PCBM | PCBM:CQDs |
|-------------------------|------|-----------|
| $R_s/\Omega$            | 7.06 | 5.31      |
| $R_{\text{rec}}/\Omega$ | 1765 | 2326      |
